# Supplementary material for: A novel flow cytometric method for enhancing acute promyelocytic leukemia screening by multidimensional dot-plots
Source: Springer Nature journal article supplement (doi:10.1007/s00277-019-03642-w), 2019-03-03

# A novel flow cytometric method for enhancing acute promyelocytic leukemia screening by multidimensional dot plots

Annals of Hematology

Bettina Kárai, Mira Habók, Gyula Reményi, László Rejtő, Anikó Ujfalusi, János Kappelmayer, Zsuzsanna Hevessy

Corresponding author: Bettina Kárai M.D.

Department of Laboratory Medicine, Faculty of Medicine, University of Debrecen,

karai.bettina@med.unideb.hu

Online Resource 1

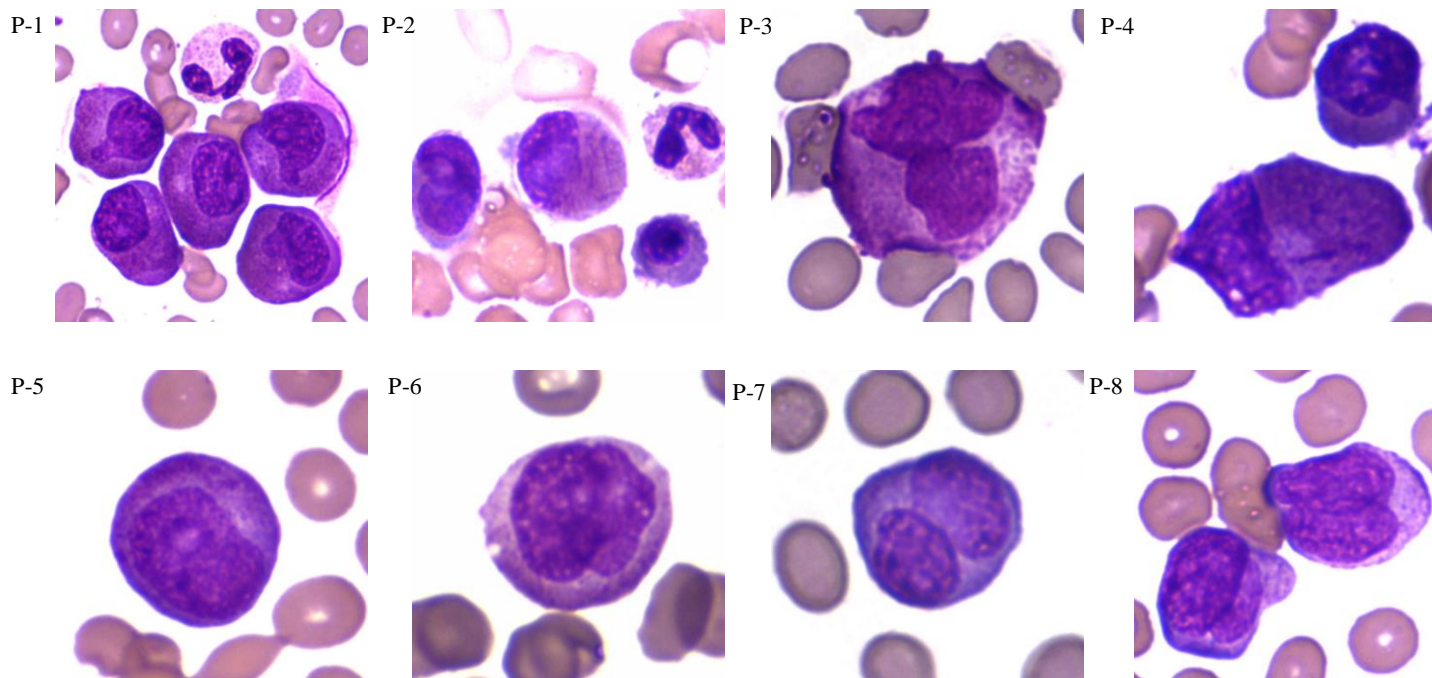

Supplement: MOESM1 [file 16523856]
